# Supplementary material for: Gene regulatory network architecture in different developmental contexts influences the genetic basis of morphological evolution
Source: PubMed Central journal article supplement (PMC5953500; doi:10.1371/journal.pgen.1007375), 2018-05-03

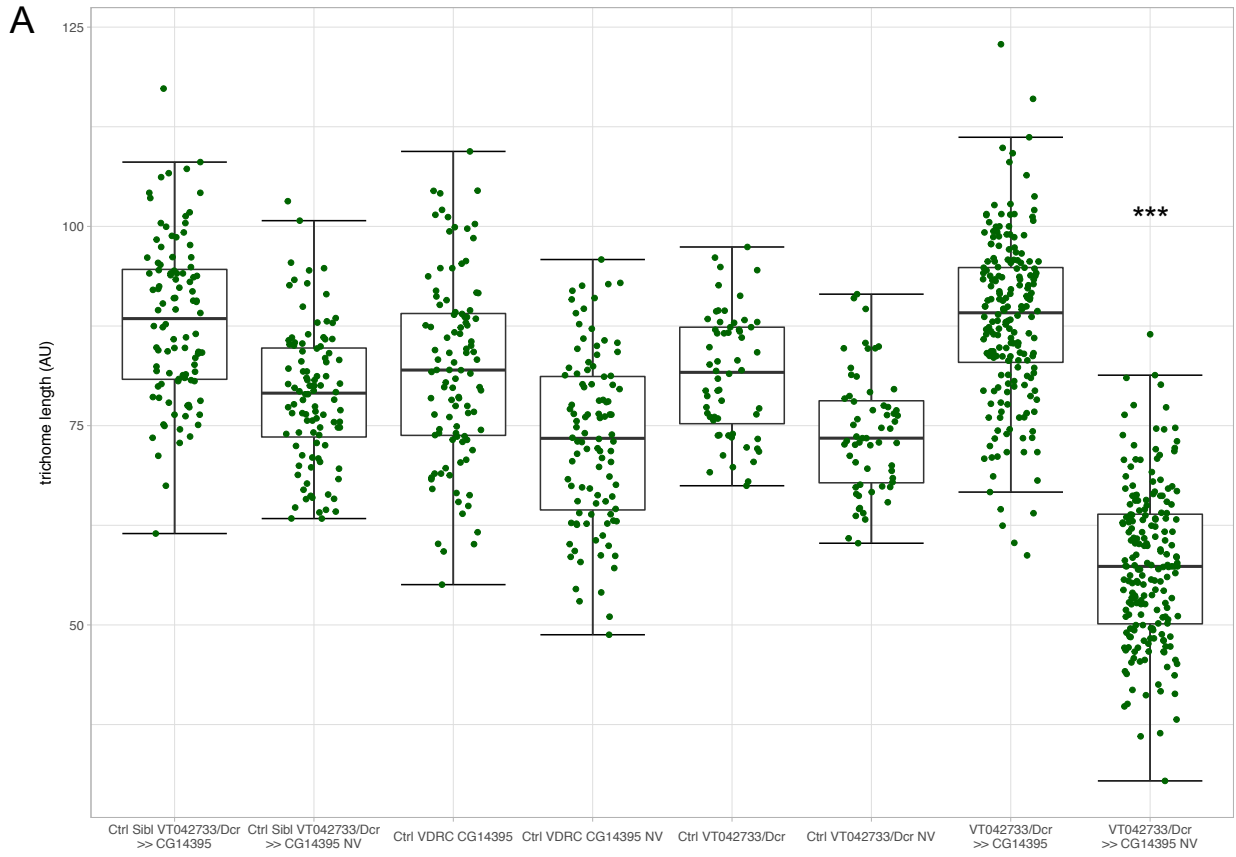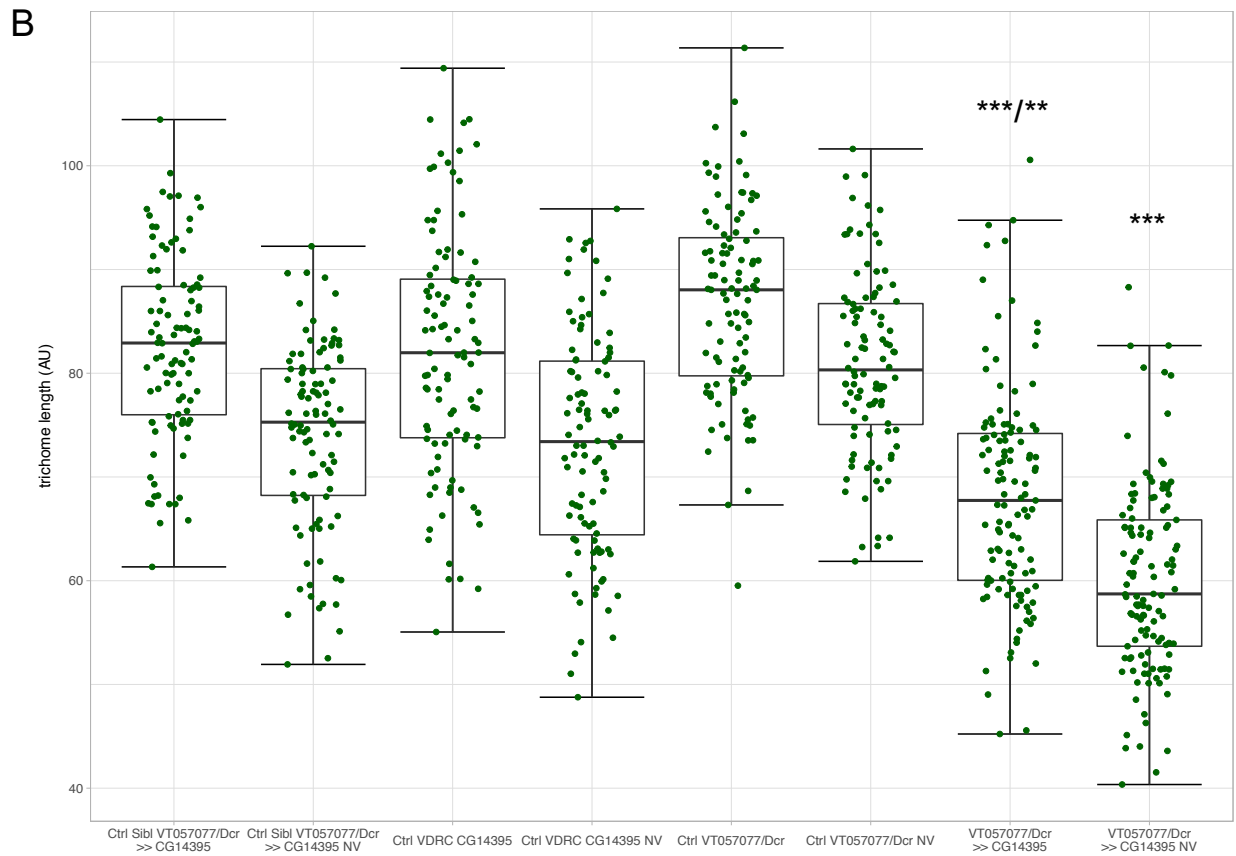

Supplement: pgen.1007375.s007.pdf [file pgen.1007375.s007.pdf]
