# Supplementary material for: Gene regulatory network architecture in different developmental contexts influences the genetic basis of morphological evolution
Source: PLoS Genet. 2018 May 3;14(5):e1007375. doi: 10.1371/journal.pgen.1007375 (PMC5953500; doi:10.1371/journal.pgen.1007375)
Supplement: S1 Table — Genes are sorted by gene name. Two rows for a gene indicate alternative transcription start sites. Expression level in fragments per kilobase per million (FPKM) with low and high confidence values, base 2 log of the fold change, and p and q values are given after mapping with TopHat 2.1.1, transcriptome assembly with Cufflinks 2.2.1 and Cuffmerge, and comparison with Cuffdiff 2.2.1 [74,75]. q values are false discovery rate (FDR)-corrected p values. (XLSX) [file pgen.1007375.s008.xlsx]

## Sheet: S1_Table
gene	eworo			OreR			log2(fold change)	p value	q value
	FPKM	FPKM low confidence	FPKM high confidence	FPKM	FPKM low confidence	FPKM high confidence
ab	1.02044	0.115841	1.92503	1.47776	0.233549	2.72198	0.534226	0.2271	0.663058
abd-A	0.0654285	0	0.132699	0.0740283	0	0.151483	0.178158	1	1
aos	20.135	0.863817	39.4062	22.3745	1.34779	43.4011	0.152146	0.79015	0.980322
Awh	1.17663	0.44564	1.90763	0.796187	0.202482	1.38989	-0.563485	0.1658	0.588028
D	0.695003	0.226297	1.16371	0.665559	0.196989	1.13413	-0.0624521	0.877	0.991561
Dl	9.38171	5.47235	13.2911	11.5974	6.95825	16.2366	0.30588	0.1985	0.630827
Egfr	71.0689	47.3158	94.822	92.1895	61.2852	123.094	0.375384	0.0571	0.35514
Egfr	7.18331	0	26.1	7.44584	0	29.3512	0.0517869	0.9505	0.995342
hh	52.3677	34.7624	69.9729	47.7114	31.7377	63.685	-0.134343	0.4912	0.88399
jigr1	78.6209	52.751	104.491	54.8044	36.6019	73.0069	-0.52062	0.00885	0.114909
lin	21.3426	14.1205	28.5646	25.6521	17.0855	34.2188	0.265344	0.1767	0.602173
N	39.2427	25.1838	53.3015	48.936	32.5323	65.3397	0.318473	0.11745	0.508326
N	0.881254	0	3.67565	1.82853	0	5.98677	1.05305	0.6945	0.954588
rho	19.3694	2.67544	36.0635	25.3927	6.36263	44.4227	0.39063	0.42685	0.84236
Ser	46.4724	31.1669	61.7779	48.1275	32.2675	63.9875	0.0504865	0.79575	0.980764
SoxN	1.7004	0.925219	2.47557	2.57414	1.5251	3.62318	0.598219	0.0182	0.181254
SoxN	0.289864	0	0.772948	0.290434	0	0.817777	0.00283292	0.9941	0.998437
spi	180.772	120.128	241.417	157.639	105.251	210.026	-0.197554	0.31905	0.75853
svb/ovo	17.092	10.3563	23.8276	21.1236	13.6124	28.6347	0.305537	0.15935	0.577344
tal	66.0339	43.585	88.4828	63.5078	42.3187	84.6968	-0.0562741	0.7779	0.978499
Ubx	8.04874	4.94822	11.1493	10.6193	6.7053	14.5333	0.399855	0.06945	0.394149
wg	26.0553	17.0993	35.0113	30.3356	20.1175	40.5537	0.219436	0.26675	0.707415
